# Supplementary material
Source: Springer Nature journal article supplement (https://www.springermedizin.de/resource/supplementary/12889_2012_5122_MOESM2_ESM.pdf/9496672)
Supplement: MOESM2 [file 9496672]

Table 2: Latrine availability and its condition, among the rural community of Bahir Dar Zuria District, May 2012 (n= 608)

| <b>Variables</b>                                             | <b>Frequency</b> | <b>Percent</b> |
|--------------------------------------------------------------|------------------|----------------|
| <b>Having latrine(n=608)</b>                                 |                  |                |
| Yes                                                          | 355              | 58.4           |
| No                                                           | 253              | 41.6           |
| <b>Type of latrine(n=355)</b>                                |                  |                |
| Pit latrine                                                  | 355              | 100.0          |
| Others                                                       | 0                | 0              |
| <b>Availability of latrine Construction material(n=608)</b>  |                  |                |
| Available                                                    | 551              | 90.6           |
| Un available                                                 | 57               | 9.4            |
| <b>Functional of latrine(n=355)</b>                          |                  |                |
| Yes                                                          | 135              | 38.0           |
| No                                                           | 220              | 62.0           |
| <b>Latrine squat cover(n=355)</b>                            |                  |                |
| Yes                                                          | 7                | 2.0            |
| No                                                           | 348              | 98.0           |
| <b>Latrine construction year(n=355)</b>                      |                  |                |
| < 2 year                                                     | 168              | 47.3           |
| => 2 year                                                    | 187              | 52.7           |
| <b>Latrine condition(n=355)</b>                              |                  |                |
| Need maintenance                                             | 202              | 56.9           |
| No need maintenance                                          | 153              | 43.1           |
| <b>Maintenance part of latrine(n=202)</b>                    |                  |                |
| Super structure                                              | 53               | 26.2           |
| Slab                                                         | 20               | 9.9            |
| Roof                                                         | 113              | 55.9           |
| Dug                                                          | 16               | 7.9            |
| <b>Availability of Hand washing facility presence(n=355)</b> |                  |                |
| Yes                                                          | 22               | 6.2            |
| No                                                           | 333              | 93.8           |
| <b>Detergent at the Hand washing facilities(n=22)</b>        |                  |                |
| Nothing                                                      | 18               | 81.8           |
| Soap                                                         | 3                | 13.6           |
| Ash                                                          | 1                | 4.6            |
| <b>Distance of Latrine from home (n=355)</b>                 |                  |                |
| <6 meters                                                    | 114              | 32.1           |
| 6-10 meters                                                  | 102              | 28.7           |
| >10 meters                                                   | 139              | 39.2           |
